# Supplementary material for: Stable carbon isotope diagnostics of mammalian metabolism, a high-resolution isotomics approach using amino acid carboxyl groups
Source: PLoS One. 2019 Oct 28;14(10):e0224297. doi: 10.1371/journal.pone.0224297 (PMC6816566; doi:10.1371/journal.pone.0224297)
Supplement: S5 Table — (XLSX) [file pone.0224297.s005.xlsx]

## Sheet: Short Run
S5 Table
results for 15AAmix reference material analysed with corresponding sampes (short run)
Associated sample		tibetab#1	tibetab#1	tibetan#2	tibetan#2	tibetan#3	tibetan#3	indian	indian	Carter	Fry	CHS	CHS	KHS	KHS	BHW	BHW	HBW	HBW	HBW
Component		d13C versus working gas
asp 25.25 sigma 6.4		-33.985	-34.437	-33.886	-33.94	-33.951	-34.24	-34.321	-33.917	-34.148	-34.878	-34.364	-34.099	-34.25	-34.204	-33.977	-34.477	-34.094	-34.306	-34.3
asp 25.25 sigma 1.6		-34.498	-33.795	-34.491	-34.624	-34.597	-34.456	-34.68	-34.236	-34.541	-33.822	-33.974	-33.097	-34.736	-34.598	-33.723	-34.483	-34.438	-34.841	-34.509
asp 25.25 sigma 0.8		-34.573	-34.936	-34.761	-34.222	-35.201	-34.405	-34.756	-35.404	-35.161	-34.391	-34.682	-33.072	-34.25	-34.607	-35.208	-35.533	-35.536	-35.021	-35.006
asp sample 20ul		-34.262	-34.174	-34.229	-34.151	-34.338	-34.105	-33.894	-34.113	-34.083	-34.408	-34.281		-34.672	-34.286	-34.314	-34.28	-34.635	-34.379	-34.373
avg asp		-34.3295	-34.3355	-34.3418	-34.2343	-34.5217	-34.3015	-34.4128	-34.4175	-34.4832	-34.3748	-34.3252	-33.4227	-34.477	-34.4237	-34.3055	-34.6932	-34.6758	-34.6367	-34.547
ser		-13.034	-13.426	-13.35	-13.366	-13.306	-12.989	-12.809	-13.338	-13.225	-13.148	-13.353		-13.169	-13.157	-13.77	-12.893	-13.686	-13.548	-13.332
glu		-62.68	-63.714	-65.206	-72.929	-66.395	-70.009	-65.255	-57.962	-65.89	-68.049	-68.042	-86.756	-77.372	-62.411	-68.433	-70.506	-66.474	-68.685	-73.239
thr		31.914	33.035	32.788	27.26	32.949	37.935	34.877	26.475	33.36	34.873	32.778	33.97	28.308	29.315	33.435	37.666	32.508	34.343	26.942
gly		-29.034	-28.788	-29.823	-29.298	-29.3	-29.457	-29.476	-29.515	-29.481	-29.501	-27.746	-26.299	-29.413	-29.686	-30.039	-29.663	-29.906	-29.713	-29.355
ala		-33.227	-33.087	-33.117	-33.013	-33.447	-33.232	-33.248	-32.402	-32.964	-33.032	-33.706	-30.742	-33.293	-33.309	-33.271	-32.923	-33.714	-33.344	-33.288
pro		-14.207	-14.242	-14.043	-14.247	-14.105	-14.002	-16.243	-13.838	-14.042	-14.372	-14.029	-11.704	-14.446	-14.231	-14.155	-14.464	-15.018	-14.503	-14.258
val+met		-59.228	-59.297	-58.912	-58.304	-59.194	-59.646	-58.319	-57.942	-59.644	-59.074	-60.165	-58.005	-59.105	-58.988	-57.721	-59.167	-58.636	-59.491	-59.372
cys		-33.634	-32.398	-33.047	-33.482	-33.656	-33.292	-34.246	-34.956	-32.843	-33.366	-33.457	-31.565	-32.714	-32.972	-32.313	-31.548	-32.148	-32.243	-32.955
his		-8.735	-17.677	-9.652	-9.478	-6.34	-7.755	-8.888	-8.887	-9.977	-9.598	-7.995	-7.142	-8.437	-8.788	-15.417	-10.394	-9.452	-10.624	-9.84
arg		-22.351	-22.609	-22.836	-22.438	-22.517	-22.591	-22.437	-22.262	-22.524	-22.38	-22.692	-21.985	-22.5	-22.55	-23.817	-22.109	-22.523	-23.05	-22.667
phe		-7.379	-7.526	-6.964	-7.667	-7.607	-7.327	-6.349	-7.317	-7.16	-6.329	-7.469	-7.632	-7.217	-7.328	-9.034	-7.372	-7.102	-8.054	-6.974

## Sheet: Long Delta
S5 Table
results for 15AAmix reference material analysed with corresponding sampes (long run)
	Associated sample		tibet#1	tibet#1	tibet#2	tibet#2	tibet#3	tibet#3	indian	indian	Carter	CHS	CHS	KHS	KHS	BWB	BWB	HWB	HWB	HWB
	date		2018-06-23	2018-06-25	2018-06-23	2018-06-25	2018-07-03	2018-07-04	2018-06-27	2018-06-27	2018-06-25	2018-07-13	2018-07-13	2018-07-12	2018-07-13	2018-07-07	2018-07-07	2018-07-08	2018-07-09	2018-07-10
	component		d13C versus working gas
	usgs41a		278.695	276.938	277.558	276.797	276.971	276.319	276.774	278.113	277.832	273.672	275.302	274.746	275.302	275.385	275.722	274.59	275.3	275.724
	glu mix		6.547	9.1	8.283	8.293	8.526	8.712	8.154	8.573	8.374	7.138	7.483	6.783	7.483	7.124	6.951	6.936	6.956	7.022
	asp 25mM sigma100g 1.2		-33.554	-33.408	-34.404	-34.2375	-33.9255	-34.0015	-33.2825	-33.1415	-34.005	-34.4095	-33.7605	-33.9105	-33.7355	-34.568	-33.971	-34.653	-34.003	-34.114
	usgs 40		-30.435	-30.615	-30.211	-30.341	-30.219	-30.217	-30.732	-30.524	-30.503	-30.537	-30.355	-30.464	-30.355	-29.931	-30.339	-30.611	-30.45	-30.335
	asp 25mM sigma 100g 0.6		-34.898	-34.485	-35.154	-34.296	-34.676	-35.115	-34.306	-33.421	-34.163	-34.934	-34.755	-34.928	-34.755	-33.825	-34.516	-34.203	-34.539	-34.462
	asp 25mM sigma 100g 0.3		-35.105	-33.969	-34.411	-34.49	-35.112	-34.319	-34.624	-34.609	-34.751	-34.198	-34.582	-34.083	-34.582	-31.909	-33.63	-34.886	-34.526	-34.085
	average asp		-34.444	-34.0215	-34.5303	-34.3211	-34.5479	-34.4654	-33.8919	-33.8051	-34.2572	-34.4254	-34.3489	-34.2979	-34.3426	-33.782	-34.1755	-34.5685	-34.418	-34.3137
	asp sample 10ul		-34.219	-34.224	-34.152	-34.261	-34.478	-34.426	-33.355	-34.049	-34.11	-34.16	-34.298	-34.27	-34.298	-34.826	-34.585	-34.532	-34.604	-34.594
	glu		-30.987	-30.642	-30.89	-30.478	-30.881	-30.216	-30.216	-30.786	-30.981	-29.841	-30.598	-30.612	-30.598	-30.418	-30.566	-31.144	-30.967	-30.947
	ser		-13.05	-12.758	-13.24	-13.114	-12.627	-12.707	-12.794	-12.302	-12.749	-12.958	-12.984	-12.793	-12.984	-13.447	-12.236	-13.548	-13.063	-12.844
	thr		-10.509	-10.472	-10.753	-10.8	-10.927	-10.175	-10.369	-11.13	-10.869	-10.362	-10.893	-10.812	-10.893	-10.44	-10.614	-11.442	-10.792	-10.988
	gly		-29.116	-29.721	-29.408	-29.312	-29.563	-29.716	-27.612	-29.046	-29.427	-29.832	-29.537	-29.361	-29.537	-29.204	-29.254	-30.25	-29.296	-29.915
	ala		-38.123	-38.979	-43.821	-42.487	-42.958	-43.7	-32.895	-40.434	-41.819	-46.948	-50.271	-52.803	-50.271	-44.184	-45.195	-44.94	-46.854	-47.336
	pro		-15.6	-17.305	-11.533	-12.066			-17.43	-14.419	-13.08	-11.647	-10.447	-8.709	-10.458	-14.871		-14.31	-12.258	-11.856
	cys 1+2				-40.29	-37.786	-50.154	-54.762				-49.202	-42.735	-46.219	-42.735
	val			-67.083	-66.872	-59.98	-67.672	-68.888				-55.496	-56.374		-66.939	-69.703
	ile		-28.721	-33.689	-33.295	-33.14	-40.085	-35.85	-24.273	-20.122	-35.244	-41.135	-35.658			-29.945		-23.724	-31.316	-31.292
	leu		-19.647	-19.282	-17.9	-17.968	-20.61	-17.454	-18.614	-19.016	-18.964	-18.911	-17.021			-17.951			-21.35	-16.682
	lys		-11.789	-11.565	-11.485	-11.719	-11.247	-10.934	-11.408	-12.169	-11.381	-10.321	-10.663	-11.195	-10.663	-12.292	-11.779	-11.954	-11.05	-11.342
	his		-10.043	-9.509	-8.766	-8.99	-9.051	-9.241	-9.436	-12.86	-9.147	-8.724	-9.156	-9.121	-10.795	-11.264	-10.394	-8.584	-12.812	-13.072
	phe		-5.703	-9.489	-8.639	-6.3	-15.415	-11.016	-7.585	-7.924	-8.538			-9.363		-11.595	-5.899	-7.719	-10.115	-11.733
	arg		-24.316	-25.084	-27.835	-28.598	-39.398	-34.31	-23.781	-25.101	-27.93			-20.643	-18.108	-25.961	-28.561	-27.965	-21.524	-35.424
